# Supplementary material
Source: ML conference proceedings conference paper supplement (https://proceedings.mlr.press/v108/zhao20d.html)
Supplement: Supplementary file [file zhao20d-supp.pdf]

# Supplementary Material

Qi Zhao\*

Ze Ye<sup>+</sup>

Chao Chen<sup>+</sup>

Yusu Wang\*

\* Department of Computer Science and Engineering The Ohio State University  
<sup>+</sup>Department of Biomedical Informatics Stony Brook University

## 1 Proof of Theorem 1

**Theorem 1.** *Let  $G = (V, E)$  be a random graph sampled from  $\text{SBM}(p_1, p_2, q, n_1, n_2)$ . Let  $u \in C_1$  and  $v \in C_2$ , compute  $\text{Dg}G_u$  and  $\text{Dg}G_v$  as described above. Given any constant  $\epsilon > 0$ , the following two inequalities hold with high probability:*

$$\begin{aligned} W_1(\text{Dg}_0G_u, \text{Dg}_1G_v) &\geq \\ &c \cdot \max\{n_1|p_1 - q - 2\epsilon|, n_2|p_2 - q - 2\epsilon|\} \\ W_1(\text{Dg}_1G_u, \text{Dg}_1G_v) &\geq \\ &c \cdot \max\{n_1^2|p_1^3 - p_1q^2 - 2\epsilon|, n_2^2|p_2^3 - p_2q^2 - 2\epsilon|\} \end{aligned} \quad (1)$$

*Proof.* Denote the number of nodes in  $G_u$  from  $C_i (i = 1, 2)$  as  $N_i (i = 1, 2)$ , the number of edges in  $G_u$  connecting two nodes from the same community  $C_i$  except  $u$  as  $N_{ii}$ , and the number of edges across two communities as  $N_e$ , then by Hoeffding's inequality, with any constant  $\epsilon > 0$  we can conclude that

$$\begin{aligned} Pr(|N_1 - n_1p_1| \leq \epsilon n_1) &\geq 1 - 2\exp(-2\epsilon^2 n_1) \\ Pr(|N_2 - n_2q| \leq \epsilon n_2) &\geq 1 - 2\exp(-2\epsilon^2 n_2) \\ Pr(|N_{11} - n_1^2p_1^3| \leq \epsilon n_1^2) &\geq 1 - 2\exp(-2\epsilon^2 n_1^2) \\ Pr(|N_{22} - n_2^2q^2p_2| \leq \epsilon n_2^2) &\geq 1 - 2\exp(-2\epsilon^2 n_2^2) \\ Pr(|N_e - n_1n_2p_1q^2| \leq \epsilon n_1n_2) &\geq 1 - 2\exp(-2\epsilon^2 n_1n_2) \end{aligned} \quad (2)$$

Consider 0-dim persistent homology, since all nodes in  $G_u$  are connected to  $u$ , the death of all topological features is 0. Recall the algorithm used for deriving our descriptor function (Eldridge et al., 2016), there are  $N_1$  persistence points locating at the segment between  $(p_1 - \delta, 0)$  and  $(p_1 + \delta, 0)$  and  $N_2$  points in the segment between  $(p_2 - \delta, 0)$  and  $(p_2 + \delta, 0)$  with probability  $\mu$ .

Consider 1-dim extended persistent homology, we category cycles in  $G_u$  into 3 sets:  $CS_1 = \{(u, u', u'') | u', u'' \in C_1\}$ ,  $CS_2 = \{(u, u', u'') | u', u'' \in C_2\}$  and the set of all other cycles,  $CS_3$ . Each cycle in  $CS_1$  or  $CS_2$  leads to a persistence point in  $\text{Dg}_1G_u$  lying in the segment between  $(p_1 - \delta, 0)$  and  $(p_1 + \delta, 0)$  or  $(p_2 - \delta, 0)$  and  $(p_2 + \delta, 0)$  with probability  $\mu$ .

Cycles in  $CS_3$  corresponds to points along the diagonal with deviation of  $2\delta$  or within  $[p_1 - \delta, p_1 + \delta] \times [q - \delta, q + \delta] \cup [p_2 - \delta, p_2 + \delta] \times [q - \delta, q + \delta]$  with the same probability. The size of  $CS_1$  and  $CS_2$  are determined by  $N_{11}$ ,  $N_{22}$  and  $N_e$ . If  $p_1 > p_2$ , then  $|CS_1| = N_{11} + N_e$  and  $|CS_2| = N_{22}$ . Otherwise  $|CS_1| = N_{11}$  and  $|CS_2| = N_{11} + N_e$ .

The numbers of such nodes and edges are induced analogously within  $G_v$ . Specially, denote the number of nodes in  $G_v$  from  $C_i (i = 1, 2)$  as  $N'_i (i = 1, 2)$ , the number of edges connecting two nodes in the same community  $C_i$  except  $v$  as  $N'_{ii}$ , it follows that

$$\begin{aligned} Pr(|N'_{11} - n_1^2q^2p_1| \leq \epsilon n_1^2) &\geq 1 - 2\exp(-2\epsilon^2 n_1^2) \\ Pr(|N'_{22} - n_2^2p_2^3| \leq \epsilon n_2^2) &\geq 1 - 2\exp(-2\epsilon^2 n_2^2) \end{aligned} \quad (3)$$

The computation of 1 - th Wasserstein distance between  $\text{Dg}_0G_u$  and  $\text{Dg}_0G_v$  is somewhat counting persistence points in the two segments, diagonal and rectangle regions mentioned above. We focus on those lying along two segments. Clearly, the distance between two persistence points in the same segment is smaller than  $2\delta$ . After pairing persistence points from  $\text{Dg}_0G_u$  and  $\text{Dg}_0G_v$  in the same segment, the persistence points left unpaired and the diagonals are paired by a bijection function minimizing their summation distance. After given  $p_1$ ,  $p_2$  and  $q$ , the distance among points in different segments or diagonal are lower bounded by

$$c = \min\{|p_1 - p_2|, |p_1 - q|, |p_2 - q|, q/\sqrt{2}\} \quad (4)$$

The number of persistence points unpaired with points lying in the same segment is  $|N_1 - N'_1| + |N_2 - N'_2|$ , it follows that

$$\begin{aligned} W_1(\text{Dg}_0G_u, \text{Dg}_1G_v) &\geq \\ &c \cdot \max\{n_1|p_1 - q - 2\epsilon|, n_2|p_2 - q - 2\epsilon|\} \end{aligned} \quad (5)$$

with probability  $(1 - 2e^{-2\epsilon^2 n_1})^2 (1 - 2e^{-2\epsilon^2 n_2})^2 \mu$ .

The computation of 1-dim persistence diagrams Wasserstein distance follows the same method. Notice that persistence points locating within two rectangle

Table 1: Statistics of experimental benchmark datasets

|                  | #Classes | #Features | #Nodes | #Edges | Edge density | Label rate |
|------------------|----------|-----------|--------|--------|--------------|------------|
| Cora             | 7        | 1433      | 2708   | 5429   | 0.0014       | 0.036      |
| Citeseer         | 6        | 3703      | 3327   | 4732   | 0.0008       | 0.052      |
| Pubmed           | 3        | 500       | 19717  | 44338  | 0.0002       | 0.003      |
| Coauthor-CS      | 15       | 6805      | 18333  | 81894  | 0.0005       | 0.016      |
| Coauthor-Physics | 5        | 8415      | 34493  | 247962 | 0.0005       | 0.003      |
| Amazon-Computers | 10       | 767       | 13381  | 245779 | 0.0027       | 0.015      |
| Amazon-Photo     | 8        | 745       | 7487   | 119043 | 0.0042       | 0.021      |

Table 2: Classification Accuracies on Benchmark Datasets

| Method           | Cora     | Citeseer | PubMed   | Coauthor<br>CS | Coauthor<br>Physics | Amazon<br>Computer | Amazon<br>Photo |
|------------------|----------|----------|----------|----------------|---------------------|--------------------|-----------------|
| <b>PEGN-JI-2</b> | 82.5±0.5 | 71.7±0.6 | 78.7±0.6 | 92.7±0.3       | 94.1±0.3            | 84.0±1.0           | 92.2±0.5        |
| <b>PEGN-JI-1</b> | 82.4±0.5 | 71.7±0.5 | 78.5±0.6 | 92.7±0.3       | 94.1±0.2            | 86.1±0.6           | 92.7±0.4        |

regions can be paired as well. The number of persistence points unpaired with points lying in the same segment is  $|N_{11} - N'_{11}| + |N_{22} - N'_{22}|$ , which leads to

$$W_1(\text{Dg}_1 G_u, \text{Dg}_1 G_v) \geq c \cdot \max\{n_1^2 |p_1^3 - p_1 q^2 - 2\epsilon|, n_2^2 |p_2^3 - p_2 q^2 - 2\epsilon|\} \quad (6)$$

with probability  $(1 - 2e^{-2\epsilon^2 n_1^2})^2 (1 - 2e^{-2\epsilon^2 n_2^2})^2 \mu$ .

□

## 2 Introduction of Datasets

Cora, Citeseer and Pubmed are citation graphs in which nodes represent documents and edges represent the undirected citation relations. Node features are elements of a bag-of-words representations of documents. In two Coauthor graphs, nodes represent authors which are connected by an edge if they jointly authored a paper. Node features are keywords for each author’s papers, and node class labels are given by the authors’ most active study fields. In two Amazon graphs, nodes represent goods and two nodes are connected if consumers frequently buy them together. Node features are bag-of-words encoded product reviews, and class labels indicate the product category. See Table 1 for the statistics of these datasets.

## 3 More Experiments Results

Besides Ollivier Ricci curvature, we also make experiments by taking Jaccard index as the weight function for graphs and construct subgraphs by picking 1-hop and 2-hop neighbourhoods around each node.

Denote them **PEGN-JI-1** and **PEGN-JI-2**, respectively. The results are reported in Table 2.

## References

Justin Eldridge, Mikhail Belkin, and Yusu Wang. Graphons, mergeons, and so on! In *Advances in Neural Information Processing Systems*, pages 2307–2315, 2016.
